# Birth weight predicts psychiatric and physical health, cognitive function, and DNA methylation differences in an adult population

Rebecca A Madden<sup>1</sup>, Daniel L McCartney<sup>2</sup>, Rosie M Walker<sup>2,4</sup>, Robert F Hillary<sup>2</sup>, Mairead L Bermingham<sup>2</sup>, Konrad Rawlik<sup>3</sup>, Stewart W Morris<sup>2</sup>, Archie Campbell<sup>2</sup>, David J Porteous<sup>2,4</sup>, Ian J Deary<sup>4,5</sup>, Kathryn L Evans<sup>2,4</sup>, Jonathan Hafferty<sup>1,†</sup>, Andrew M McIntosh<sup>1,2,4,†</sup>, Riccardo E Marioni<sup>2,4,†,\*</sup>

1. Division of Psychiatry, University of Edinburgh, Royal Edinburgh Hospital, Edinburgh, EH10 5HF, UK

2. Centre for Genomic and Experimental Medicine, Institute of Genetics and Molecular Medicine, University of Edinburgh, Edinburgh, EH4 2XU, UK

3. The Roslin Institute, Royal (Dick) School of Veterinary Studies, University of Edinburgh, Midlothian, UK

4. Centre for Cognitive Ageing and Cognitive Epidemiology, University of Edinburgh, Edinburgh, EH8 9JZ, UK

5. Department of Psychology, University of Edinburgh, Edinburgh, EH8 9JZ, UK

\* Corresponding Author: Riccardo E Marioni, Centre for Genomic and Experimental Medicine, Institute of Genetics and Molecular Medicine, University of Edinburgh, Edinburgh, EH4 2XU, UK. Email: [riccardo.marioni@ed.ac.uk](mailto:riccardo.marioni@ed.ac.uk) Telephone: +44 (0)131 651 8528

† These authors contributed equally

Manuscript word count: 2,796

# Abstract

*Introduction:* The Developmental Origins of Adult Disease (DOAD) theory predicts that prenatal and early life events shape adult health outcomes. Birth weight is a useful indicator of the foetal experience, and has been associated with multiple adult health outcomes. DNA methylation (DNAm) is one plausible mechanism behind the relationship of birth weight to adult health.

*Methods:* The Generation Scotland study purposefully oversampled individuals from three historic Scottish birth cohort studies containing birthweight information, and linked additional individuals to their birth records through the NHS Information and Statistics Division. Data linkage with these sources yielded a sample of 4,710 individuals. Health and disease measures were related to birth weight in regression models. An epigenome-wide association study (EWAS) was performed in a subgroup (n=1,395), relating adult DNAm to birth weight. Replication was assessed in an independent sample (n=362)

*Results:* Higher birth weight was significantly associated with reduced incidence of depression, higher body mass index (BMI), lower risk of osteoarthritis, and higher general intelligence score (absolute standardised effect sizes ranged from 0.04 to 0.30,  $P_{(FDR)} < 0.05$ ). Meta-analysis of the discovery and replication EWAS studies yielded one genome-wide significant CpG site ( $p = 5.97 \times 10^{-9}$ ), which was located in a gene linked to placental embedding.

*Conclusions:* Our results demonstrate associations between birth weight and adult health and functional outcomes, with particularly striking effects for depression risk. It also provides support for an association between birth weight and DNAm. This study is the first to describe an EWAS of birth weight in an adult sample.

# Introduction

The Developmental Origins of Adult Disease theory (DOAD) states that through developmental plasticity, the foetal experience can permanently influence adult health [1]. The theory's main proponent, David Barker, originally relied on birth weight as an index of foetal nutrition – an assumption that has been contested by the awareness that multiple factors can influence birth weight [2]. Maternal stress, illness, and socioeconomic status [3-5] are among modifiable influences over offspring birth weight; in addition, maternal-specific genetic variation has been found to influence birth weight, acting through the intrauterine environment [6]. Thus, birth weight can be seen as an index of the general foetal experience.

There is evidence of a U-shaped association between birth weight and adult health. Birth weight is clinically conceptualised as 'low' below 2.5kg, and 'high' above 4.5kg [7], however it can also be analysed on a continuous scale. Lower birth weight has been associated with an increased risk of heart disease, type II diabetes, stroke, and hypertension [8-11]. Low birth weight is also associated with poorer cognitive ability, and a raised risk for mood disorders [12, 13]. At the higher end of the spectrum, birth weight is associated with higher body mass index, and higher risk of breast cancer [14, 15]. These associations are found after accounting for adult lifestyle factors, such as smoking and BMI, indicating a residual effect of birth weight on health outcomes. Since birth weight information is recorded as standard practice, it could be considered a useful and readily available predictive tool for adult health risks.

The DOAD theory is a plausible explanation for these observations. Prenatal factors affect the foetus in its highly plastic state, giving rise to birth weight variability, and also to developmental changes which permanently affect the function and health of organs and systems [1]. Some of these changes may be structural, affecting for example, vascular development and function [16]. DNA methylation (DNAm) is an epigenetic modification that can be influenced by genetics or by environmental factors throughout life. CpG methylation is characterised by the addition of a methyl group to cytosine nucleotides in the context of cytosine-guanine dinucleotides. DNAm changes are linked to the regulation of gene expression, providing a possible mechanism through which environmental influences may have lasting biological effects [17]. Therefore, DNAm is one putative mechanism through which developmental experience may influence adult health. Birth weight effects on the epigenome have been previously described in cord blood [18, 19] and during childhood [20], seeming to diminish into adolescence and beyond [18, 21].

Here, we describe associations between birth weight and a range of adult health conditions and risk factors, using high-quality data that improves on previous work in the field (e.g. [13]); it also reports an Epigenome-Wide Association Study (EWAS) of birthweight in an adult sample. While previous work has looked at DNAm relationships to birth weight in adults, none have performed EWAS studies in this age group, looking instead at persistence of DNAm effects from birth [18, 21]. We, therefore, hypothesise that while birth weight associated DNAm patterns may change over time, differences will still exist in adulthood.

## Methods

### *Generation Scotland and other Cohorts*

Generation Scotland (GS) is a Scottish family-based cohort n=23,690 [22]. Data were collected from participants between 2006 and 2011. 98% of GS participants gave informed consent for data linkage to routinely collected health data and to information from other Scottish population cohort studies, both current and historical. These include several with neonatal and maternity information: the Aberdeen Children of the 1950s ([23], ACONF); the Aberdeen Maternity and Neonatal Databank ([24], AMND); the Walker Birth Cohort [25]; and the Scottish Morbidity Records ([26], SMR02 – the Maternity Inpatient and Day Case record, and SMR11 – the Neonatal Inpatient dataset). Birth weight in grams, alongside gestational age at birth and twin information, was collated from these sources and linked to adult GS records for 4,713 participants (**Supplementary File 1**).

### *Ethics*

All components of GS received ethical approval from the NHS Tayside Committee on Medical Research Ethics (REC Reference Number: 05/S1401/89). GS has also been granted Research Tissue Bank status by the Tayside Committee on Medical Research Ethics (REC Reference Number: 10/S1402/20), providing generic ethical approval for a wide range of uses within medical research.

### *Statistical Analyses*

All analyses were conducted in R version 3.5.1 [27].

To control for the known effects of gestational age and sex on birthweight [28], we considered the residuals from a regression model in place of raw birth weight throughout:

$$\text{Birth weight (g)} \sim \text{sex} + \text{gestational age}$$

Self-reported diseases (yes/no) that were commonly reported in the cohort (prevalence >1%) included depression (prevalence 6.6%), osteoarthritis (1.6%), high blood pressure (3.4%), diabetes (1.3%), and asthma (16.6%). These were modelled against the birth weight residuals using logistic regression. Average diastolic and systolic blood pressure measurements, body mass index, high-density lipoprotein (HDL) cholesterol, and general intelligence score (derived from multiple cognitive tests - *see **Supplementary File 1***) were examined as continuous variables in linear regression models. Depression diagnosed using the Structured Clinical Interview for DSM-IV (SCID;[29] was also examined, as a binary yes/no for a diagnosis of major depressive disorder (**Supplementary File 1**). Three individuals who had responded 'yes' to all self-reported illnesses were excluded from analyses, leaving a final population of n=4,710. Some traits had missing values, which resulted in case-wise exclusion from the relevant regression model (**Table 1**).

Adult health and functional domains were regressed against birth weight residuals and relevant covariates in a simple model:

$$\text{Trait} \sim \text{birth weight residuals} + \text{sex} + \text{age}$$

And in a fully-adjusted model:

$$\text{Trait} \sim \text{birth weight residuals} + \text{sex} + \text{age} + \text{Scottish Index of Multiple Deprivation (SIMD) quintile} + \text{lifetime smoking (ever/never)} + \text{years of education}$$

For the general intelligence trait, years of education was removed from this fully-adjusted model as the two are highly collinear (Pearson  $r=0.36$ ).

Correction for multiple testing was carried out using a false discovery rate  $P<0.05$ .

### *Epigenome-wide association study*

Genome-wide DNA methylation was profiled in 5,190 individuals in GS, taken from peripheral whole blood, using the Illumina HumanMethylationEPIC BeadChip (Illumina Inc., San Diego, CA). Quality control and normalisation were carried out as described elsewhere ([30, 31]; **Supplementary File 2**). For the subgroup of GS for whom birth weight and gestational age information were available, DNAm data was available for n=1,395.

In a second release of data generated during this analysis, using a near identical protocol (**Supplementary File 2**), an independent set of methylation data became available for an additional 4,450 GS participants. In this replication sample, a further 362 participants with both birth weight and gestational age information were used.

The birth weight residuals described above were used in the EWAS model, which was run using the ‘limma’ package in R (empirical Bayes moderated t-statistics). The discovery EWAS model used CpGs corrected for relatedness (**Supplementary File 2**), as the first batch of DNAm data was collected on related individuals:

$$\text{CpG} \sim \text{birth weight residuals} + \text{age} + \text{sex} + \text{ever smoked (Yes/No)} + \text{Pack years smoking} + 20 \text{ methylation PCs}$$

Additional covariates (estimated white blood cell proportions – CD4T, CD8T, Granulocytes, BCells, Natural Killer cells – and methylation batch), which were regressed out during the relatedness pre-correction for the discovery dataset, were also included in the replication dataset of unrelated individuals.

#### *Meta-Analysis of discovery and replication samples*

A standard error-weighted meta-analysis of the discovery and replication EWASs was performed using the METAL software package. Summary statistics from the discovery, replication and meta-analysis EWASs are available at [**weblink to be inserted upon acceptance**].

## **Results**

### *Phenotype population characteristics*

There were 4,710 GS participants with birth weight and gestational age information available (**Table 1**). The population was 57% female, with a mean birth weight of 3.40kg (SD=0.52), and gestational age of 39.8 weeks (SD=1.7). The minimum birth weight in the sample was 0.7kg, the maximum was 5.1kg. Using the clinical cut-off of 2.5kg, 3.99% (n=188) of the sample were of clinically ‘low’ birth weight. This means the data describe phenotypic relationships to birth weight across pathological and non-pathological cases.

### *Relationship of adult outcomes to birth weight*

Regression models identified significant associations between higher birth weight (effect sizes are reported per SD) and lower risk of SCID-diagnosed depression (OR=0.86; 95% CI 0.78-0.95, p=0.018);

lower risk of self-reported osteoarthritis (OR=0.74; 95% CI 0.58-0.94;  $p=0.034$ ); higher BMI ( $\beta=0.072$ ; SE=0.016,  $p=3.7 \times 10^{-5}$ ) and higher general intelligence ( $\beta=0.042$ ; SE=0.016,  $p=0.027$ ; **Table 2**).

In minimally-adjusted regression models (covarying for age and sex alone), higher birth weight showed a relationship with lower self-reported depression risk (OR=0.85; 95% CI 0.75-0.96;  $p=0.018$ ). Associations were also found for the four traits described above, but no other adult health or functional outcomes (**Supplementary File 3**).

#### *Epigenome-wide association study of birthweight*

The epigenome-wide association study of birth weight revealed no CpGs significant at the genome-wide level ( $P < 3.6 \times 10^{-8}$ ; [32]), although 19 CpGs had  $P < 1 \times 10^{-5}$  (minimum FDR corrected P-value of  $6.05 \times 10^{-8}$  for cg00966482) (**Figure 1A**; **Supplementary File 4**). The 19 CpGs were largely uncorrelated, with the exception of three CpGs (located within *CASZ1* – two within 200 base pairs of each other, with the third site around 11kb away – **Supplementary File 4**) that had absolute  $r \geq 0.6$  (**Figure 2**).

#### *Replication in an independent DNAm sample*

There were no genome-wide significant associations in the replication sample ( $n=362$ ) (**Figure 1B**; **Supplementary File 5**).

Of the 19 CpGs that exceeded the suggestive significance threshold in the discovery EWAS, two reached nominal significance ( $P < 0.05$ ) in the replication analysis: cg00590817 ( $p=0.0069$ ), and cg00966482 ( $p=0.031$ ). The latter CpG was the most significantly associated site from the discovery EWAS ( $p=6.05 \times 10^{-8}$ ) and is found within the *HERV-FRD* (also referred to as *ERVFRD-1*) gene. There was good concordance between the effect sizes of DNAm associations with birthweight in the discovery and replication studies ( $r=0.59$ ) (**Figure 3**).

#### *Meta-analysis of discovery and replication samples*

Meta-analysis of the original discovery EWAS sample with the replication sample found a genome-wide significant effect of birthweight on DNAm at the CpG site cg00966482 located in the *ERVFRD-1* gene ( $p=5.97 \times 10^{-9}$ ; **Figure 1C**; **Supplementary File 6**).

## **Discussion**

We observed a strong association between birth weight and adult depression, where a 1 standard deviation (SD; 0.52kg) increase in birth weight was linked to 15% lower odds of future depression. A 1SD increase in birth weight was also linked to a 0.072 SD ( $\sim 0.37\text{kg/m}^2$ ) higher adult BMI, a 0.042 SD higher general intelligence score, and 30.7% lower odds for self-reported osteoarthritis. We also identified one genome-wide significant association between birth weight and blood-based DNA methylation in adulthood.

### *Birth weight and depression*

Previous studies have found both positive and negative associations between birth weight and depression. A meta-analysis of 18 studies ( $n \sim 50,000$ ) found support for a modest effect of low birthweight ( $< 2.5\text{kg}$ ) on depression risk ( $\text{OR} = 1.15$ , 95%  $\text{CI} = 1.00\text{--}1.32$ ), but suggested this was a result of publication bias [13]. We improved upon the design of many of the papers within that meta-analysis by utilising clinician-diagnosed depression and birth weight as a continuous variable (compared to self-reported measures of depression or psychological distress and use of a binary ( $< 2.5\text{kg}$  vs normal) birth weight variable). Compared to SCID-diagnosed depression, we found self-reported depression had a weaker association with birth weight. Furthermore, the association with the self-reported measure was statistically significant in the minimally-adjusted but not fully-adjusted regression models. This emphasises the importance of using high quality, clinically meaningful tools for measuring psychiatric disorders. The aetiology of depression is complex, with multiple biological and psychosocial factors contributing increments of risk, thought to sum towards illness. This study indicates that birth weight may be considered as one of these contributing risk factors, as its association with adult diagnosis remained after accounting for many adult lifestyle factors.

### *Birth weight and other outcomes*

Consistent with the published literature [11, 14], we identified an association between higher birth weight and higher adult BMI. Previous work has used Mendelian randomisation techniques to show that birthweight is a causal factor in determining adult BMI [9]. We also found a significant relationship between higher birth weight and lower prevalence of osteoarthritis in this sample. Developmental origins of osteoarthritis have been described before, with higher disease prevalence in low birth weight individuals [33], and those with low weight at age one [34].

A positive association between birth weight and general intelligence is also reported here (1SD increase in birthweight results in a 0.042 SD higher general intelligence score). Impaired cognitive



ability after low birth weight has been shown in several samples in childhood [12] and into adulthood [35].

Some previously-established effects of birth weight on adult health are not supported here, for instance, links to type 2 diabetes and cardiovascular disease [9]. This may be partly due to the self-report nature of the health measures used. Our sample size was also smaller than previous investigations into birth weight and cardiovascular outcomes [9, 11].

### *Epigenome-wide association study of birth weight in adult samples*

In the EWAS meta-analysis we observed a genome-wide significant association between higher birthweight and higher methylation levels at cg00966482 (*ERVFRD-1*). *ERVFRD-1* encodes syncitin-2, a protein involved in placental embedding [36]. This site was not identified in a previous meta-analysis EWAS of birthweight [21]. Moreover, this is the first report of a genome-wide significant EWAS association for birth weight in an adult sample.

Of the 19 CpG sites with  $P < 1 \times 10^{-5}$  in the discovery EWAS, 10 were located within known genes. Some of these genes contain SNPs that have genome-wide associations (with  $P < 5 \times 10^{-8}$ ) with cardiovascular, psychiatric, and developmental pathways (**Supplementary File 7**). Three of the 19 nominally significant CpG sites identified in the discovery EWAS were highly correlated (min  $r = 0.69$ ). Higher birthweight was associated with higher methylation levels at these sites, which were located within *CASZ1*, a gene encoding the zinc finger protein castor homolog 1, a transcriptional activator involved in vascular morphogenesis [37]. *CASZ1* was recently identified as differentially methylated in placental tissue between infants born small vs. large for gestational age [19], thus this study suggests the persistence of differential methylation of this gene into adulthood. Genetic variants in *CASZ1* have previously been implicated in GWAS studies on various aspects of cardiovascular health (**Supplementary File 7**). These have included studies in multi-ethnic populations on blood pressure [38, 39], and on other cardiovascular health issues such as atrial fibrillation [40] and stroke [41].

A recent longitudinal meta-analysis [21] of DNAm relationships to birth weight identified 914 CpG sites associated with birth weight in 24 EWAS studies from neonatal blood (total  $n = 8,825$ ). The persistence of methylation differences at these sites was then examined in other cohort data from childhood (total  $n = 2,756$  from 10 studies; 2-12y), adolescence (total  $n = 2,906$  from 6 studies; 16-18y), and adulthood (1,616 from 3 studies; 30-45y). Nominally significant methylation differences were found to persist into childhood, adolescence, and adulthood at 87, 49, and 42 sites respectively. This

supports evidence that birth weight-related methylation differences may attenuate over time [18, 20]. It has, however, been demonstrated that some methylation patterns persist into late adulthood after prenatal famine exposure [42]. It is therefore plausible that other prenatal factors may continue to affect DNAm into adulthood.

### *Strengths and Limitations*

This study exploited rarely available data linkage capacity to acquire neonatal information from birth medical records. The phenotyping and DNAm data available within the cohort have allowed the association of both health traits and DNAm data with birth weight. There are, however, some limitations inherent to the cross-sectional design of this study. Longitudinal data would allow analysis of the persistence of DNAm signatures across time. In addition, the number of individuals for whom accurate birth weight and gestational information could be identified in historical health cohorts limited the sample size for the EWAS analyses.

### *Conclusions*

This study presents the first epigenome wide association study of birth weight on DNA methylation in adulthood. We also present a comprehensive study of birth weight in relation to cognitive, psychiatric, and disease traits in mid-life. The Developmental Origins of Adult Disease theory predicts that birth weight can affect many domains of adult physical and psychological health. We found evidence to support this at both the molecular and broad disease/health phenotype levels.

### **Acknowledgements**

GS received core support from the Chief Scientist Office of the Scottish Government Health Directorates (CZD/16/6) and the Scottish Funding Council (HR03006). Genotyping and DNA methylation profiling of the GS samples was carried out by the Genetics Core Laboratory at the Wellcome Trust Clinical Research Facility, Edinburgh, Scotland and was funded by the Medical Research Council UK and the Wellcome Trust (Wellcome Trust Strategic Award “STratifying Resilience And Depression Longitudinally” ((STRADL) Reference 104036/Z/14/Z). This work was conducted in the Centre for Cognitive Ageing and Cognitive Epidemiology, which is supported by the Medical Research Council and Biotechnology and Biological Sciences Research Council (MR/K026992/1). DLM and REM are supported by Alzheimer’s Research UK major project grant ARUK-PG2017B-10. RAM and RFH are supported by funding from the Wellcome Trust 4-year PhD in Translational Neuroscience – training the next generation of basic neuroscientists to embrace clinical research [108890/Z/15/Z].

# References

1. Barker, D.J., *The developmental origins of adult disease*. J Am Coll Nutr, 2004. **23**(6 Suppl): p. 588s-595s.
2. Paneth, N. and M. Susser, *Early origin of coronary heart disease (the "Barker hypothesis")* British Medical Journal, 1995. **310**(6977): p. 411-412.
3. Rondo, P.H.C., et al., *Maternal psychological stress and distress as predictors of low birth weight, prematurity and intrauterine growth retardation*. European Journal of Clinical Nutrition, 2003. **57**(2): p. 266-272.
4. Grote, N.K., et al., *A Meta-analysis of Depression During Pregnancy and the Risk of Preterm Birth, Low Birth Weight, and Intrauterine Growth Restriction*. Archives of General Psychiatry, 2010. **67**(10): p. 1012-1024.
5. Rosen, D., et al., *Intimate partner violence, depression, and posttraumatic stress disorder as additional predictors of low birth weight infants among low-income mothers*. Journal of Interpersonal Violence, 2007. **22**(10): p. 1305-1314.
6. Warrington, N.M., et al., *Maternal and fetal genetic effects on birth weight and their relevance to cardio-metabolic risk factors*. Nature Genetics, 2019. **51**(5): p. 804-814.
7. Kiserud, T., et al., *The World Health Organization Fetal Growth Charts: A Multinational Longitudinal Study of Ultrasound Biometric Measurements and Estimated Fetal Weight*. PLoS Medicine, 2017. **14**(1): p. 1-36.
8. Huxley, R., et al., *Is birth weight a risk factor for ischemic heart disease in later life?* American Journal of Clinical Nutrition, 2007. **85**(5): p. 1244-1250.
9. Zanetti, D., et al., *Birthweight, Type 2 Diabetes Mellitus, and Cardiovascular Disease Addressing the Barker Hypothesis With Mendelian Randomization*. Circulation-Genomic and Precision Medicine, 2018. **11**(6).
10. Mu, M., et al., *Birth weight and subsequent blood pressure: A meta-analysis*. Archives of Cardiovascular Diseases, 2012. **105**(2): p. 99-113.
11. Rich-Edwards, J.W., et al., *Longitudinal study of birth weight and adult body mass index in predicting risk of coronary heart disease and stroke in women*. British Medical Journal, 2005. **330**(7500): p. 1115-1118A.
12. Shenkin, S.D., J.M. Starr, and I.J. Deary, *Birth weight and cognitive ability in childhood: A systematic review*. Psychological Bulletin, 2004. **130**(6): p. 989-1013.
13. Wojcik, W., et al., *Foetal origins of depression? A systematic review and meta-analysis of low birth weight and later depression*. Psychological Medicine, 2013. **43**(1): p. 1-12.
14. Curhan, G.C., et al., *Birth weight and adult hypertension and obesity in women*. Circulation, 1996. **94**(6): p. 1310-1315.
15. Xu, X.H., et al., *Birth Weight as a Risk Factor for Breast Cancer: A Meta-Analysis of 18 Epidemiological Studies*. Journal of Womens Health, 2009. **18**(8): p. 1169-1178.
16. Leeson, C.P.M., et al., *Flow-mediated dilation in 9- to 11-year-old children - The influence of intrauterine and childhood factors*. Circulation, 1997. **96**(7): p. 2233-2238.
17. Jaenisch, R. and A. Bird, *Epigenetic regulation of gene expression: how the genome integrates intrinsic and environmental signals*. Nature Genetics, 2003. **33**: p. 245-254.
18. Simpkin, A.J., et al., *Longitudinal analysis of DNA methylation associated with birth weight and gestational age*. Human Molecular Genetics, 2015. **24**(13): p. 3752-3763.
19. Chen, P.-Y., et al., *Prenatal Growth Patterns and Birthweight Are Associated With Differential DNA Methylation and Gene Expression of Cardiometabolic Risk Genes in Human Placentas: A Discovery-Based Approach*. Reproductive Sciences, 2018. **25**(4): p. 523-539.
20. Agha, G., et al., *Birth weight-for-gestational age is associated with DNA methylation at birth and in childhood*. Clinical Epigenetics, 2016. **8**.
21. Küpers, L.K., et al., *Meta-analysis of epigenome-wide association studies in neonates reveals widespread differential DNA methylation associated with birthweight*. Nature Communications, 2019. **10**(1): p. 1893.

22. Smith, B.H., et al., *Cohort Profile: Generation Scotland: Scottish Family Health Study (GS:SFHS). The study, its participants and their potential for genetic research on health and illness*. International Journal of Epidemiology, 2013. **42**(3): p. 689-700.
23. Leon, D.A., et al., *Cohort profile: The Aberdeen children of the 1950s study*. International Journal of Epidemiology, 2006. **35**(3): p. 549-552.
24. Ayorinde, A.A., et al., *Data Resource Profile: The Aberdeen Maternity and Neonatal Databank (AMND)*. International Journal of Epidemiology, 2016. **45**(2): p. 389-394.
25. Libby, G., et al., *The Walker Project: A longitudinal study of 48 000 children born 1952-1966 (aged 36-50 years in 2002) and their families*. Vol. 18. 2004. 302-12.
26. Ndc.scot.nhs.uk. *ISD Scotland | Information Services Division*. . 2018; Available from: <http://www.ndc.scot.nhs.uk/Dictionary-A-Z/index.asp>.
27. Team, R.C., *R: A language and environment for statistical computing*. R Foundation for Statistical Computing. 2018: Vienna, Austria. p. <https://www.R-project.org/>.
28. Norris, T., et al., *Updated birth weight centiles for England and Wales*. Archives of Disease in Childhood-Fetal and Neonatal Edition, 2018. **103**(6): p. F577-F582.
29. Kübler, U., *Structured Clinical Interview for DSM-IV (SCID)*, in *Encyclopedia of Behavioral Medicine*, M.D. Gellman and J.R. Turner, Editors. 2013, Springer New York: New York, NY. p. 1919-1920.
30. McCartney, D.L., et al., *Investigating the relationship between DNA methylation age acceleration and risk factors for Alzheimer's disease*. Alzheimer's & Dementia: Diagnosis, Assessment & Disease Monitoring, 2018. **10**: p. 429-437.
31. Bermingham, M.L., et al., *Identification of novel differentially methylated sites with potential as clinical predictors of impaired respiratory function and COPD*. bioRxiv, 2018: p. 473629.
32. Saffari, A., et al., *Estimation of a significance threshold for epigenome-wide association studies*. Genetic Epidemiology, 2018. **42**(1): p. 20-33.
33. Hussain, S.M., et al., *Association of Low Birth Weight and Preterm Birth With the Incidence of Knee and Hip Arthroplasty for Osteoarthritis*. Arthritis Care & Research, 2015. **67**(4): p. 502-508.
34. Clynes, M.A., et al., *Further evidence of the developmental origins of osteoarthritis: results from the Hertfordshire Cohort Study*. Journal of Developmental Origins of Health and Disease, 2014. **5**(6): p. 453-458.
35. Richards, M., et al., *Birth weight and cognitive function in the British 1946 birth cohort: longitudinal population based study*. British Medical Journal, 2001. **322**(7280): p. 199-203.
36. Chen, C.-P., et al., *Functional Characterization of the Human Placental Fusogenic Membrane Protein Syncytin 21*. Biology of Reproduction, 2008. **79**(5): p. 815-823.
37. Charpentier, Marta S., et al., *CASZ1 Promotes Vascular Assembly and Morphogenesis through the Direct Regulation of an EGFL7/RhoA-Mediated Pathway*. Developmental Cell, 2013. **25**(2): p. 132-143.
38. Kato, N., et al., *Meta-analysis of genome-wide association studies identifies common variants associated with blood pressure variation in east Asians*. Nature Genetics, 2011. **43**(6): p. 530-U57.
39. Ehret, G.B., et al., *The genetics of blood pressure regulation and its target organs from association studies in 342,415 individuals*. Nature Genetics, 2016. **48**(10): p. 1171-1184.
40. Roselli, C., et al., *Multi-ethnic genome-wide association study for atrial fibrillation*. Nature Genetics, 2018. **50**(9): p. 1225-+.
41. Malik, R., et al., *Multiancestry genome-wide association study of 520,000 subjects identifies 32 loci associated with stroke and stroke subtypes*. Nature Genetics, 2018. **50**(4): p. 524-+.
42. Heijmans, B.T., et al., *Persistent epigenetic differences associated with prenatal exposure to famine in humans*. Proceedings of the National Academy of Sciences, 2008. **105**(44): p. 17046-17049.



**Table 1:** Population characteristics of the phenotyped and EWAS samples.

|                             | Phenotype Sample |      |      | EWAS Sample |      |      |
|-----------------------------|------------------|------|------|-------------|------|------|
|                             | N                | Mean | SD   | N           | Mean | SD   |
| Age (years)                 | 4,710            | 29.5 | 10.9 | 1,395       | 37.1 | 14.7 |
| Birthweight (g)             | 4,710            | 3399 | 516  | 1,395       | 3377 | 518  |
| Gestation (weeks)           | 4,710            | 39.8 | 1.7  | 1,395       | 40   | 1.8  |
| BMI (kg/m <sup>2</sup> )    | 4,385            | 25.2 | 5.2  | 1,387       | 26.1 | 5.4  |
| Education*                  | 4,411            | 5    | 4-6  | 1,317       | 5    | 3-6  |
|                             | N                | %    |      | N           | %    |      |
| Sex - Male                  | 2,025            | 43.0 |      | 569         | 40.8 |      |
| Female                      | 2,688            | 57.0 |      | 826         | 59.2 |      |
| Socioeconomic Status**      | (4,389)          |      |      | (1,310)     |      |      |
| Quintile 1 (most deprived)  | 621              | 14.2 |      | 207         | 15.8 |      |
| Quintile 2                  | 717              | 16.3 |      | 210         | 16.0 |      |
| Quintile 3                  | 715              | 16.3 |      | 183         | 14.0 |      |
| Quintile 4                  | 1064             | 24.2 |      | 301         | 23.0 |      |
| Quintile 5 (least deprived) | 1272             | 29.0 |      | 409         | 31.2 |      |
| Smoking                     | (4,525)          |      |      | (1,344)     |      |      |
| Current Smoker              | 918              | 20.3 |      | 257         | 19.1 |      |
| Ex-Smoker (<12 months)      | 237              | 5.2  |      | 56          | 4.2  |      |
| Ex-Smoker (>12 months)      | 662              | 14.6 |      | 273         | 20.3 |      |
| Never Smoker                | 2,708            | 59.8 |      | 758         | 56.4 |      |

\* Median and Interquartile range reported. Education was coded as an ordinal variable: 0 = 0yrs, 1 = 1-4yrs, 2 = 5-9yrs, 3 = 10-11yrs, 4 = 12-13yrs, 5 = 14-15yrs, 6 = 16-17yrs, 7 = 18-19yrs, 8 = 20-21yrs, 9 = 22-23yrs, 10 = ≥24yrs.

\*\*SIMD Quintile. SIMD is the Scottish Index of Multiple Deprivation, a postcode-derived index of socioeconomic status. The quintiles derived on the full Generation Scotland cohort ranged from 1 (most deprived) to 5 (least deprived).

**Table 2:** Outputs of logistic and linear regression models of health traits ~ birth weight residuals + age + sex + socioeconomic status (SIMD) + ever smoke + education years, with FDR-correction for multiple testing.

\*For the 'g' general intelligence factor, education years was removed from the model as it resulted in over-correction of the effect.

| <b>Trait</b>                         | <b>Odds Ratio</b> | <b>95% CI</b> | <b>P value</b>       | <b>P (FDR)</b>       |
|--------------------------------------|-------------------|---------------|----------------------|----------------------|
| SCID depression                      | 0.86              | 0.78 - 0.95   | 0.0033               | 0.018                |
| SR depression                        | 0.92              | 0.81 - 1.05   | 0.21                 | 0.38                 |
| SR hypertension                      | 0.93              | 0.78 - 1.09   | 0.36                 | 0.44                 |
| SR diabetes                          | 0.96              | 0.74 - 1.25   | 0.76                 | 0.76                 |
| SR osteoarthritis                    | 0.74              | 0.58 - 0.94   | 0.012                | 0.034                |
| SR asthma                            | 0.96              | 0.88 - 1.04   | 0.3                  | 0.43                 |
| <b>Trait</b>                         | <b>Beta</b>       | <b>SE</b>     | <b>P value</b>       | <b>P (FDR)</b>       |
| Body Mass Index (kg/m <sup>2</sup> ) | 0.072             | 0.016         | 3.4x10 <sup>-6</sup> | 3.7x10 <sup>-5</sup> |
| HDL cholesterol                      | 0.025             | 0.016         | 0.12                 | 0.27                 |
| Average systolic BP                  | -0.014            | 0.014         | 0.32                 | 0.43                 |
| Average diastolic BP                 | -0.011            | 0.015         | 0.47                 | 0.51                 |
| General intelligence*                | 0.042             | 0.016         | 0.0074               | 0.027                |



**Figure 1:** Manhattan plots for the epigenome-wide association study of birth weight (A); the replication sample EWAS (B); and the meta-analysis of the main EWAS and the replication (C). The black and red lines represent the suggestive, and Bonferroni corrected P-value thresholds of  $P=1 \times 10^{-5}$  and  $3.6 \times 10^{-8}$ , respectively.

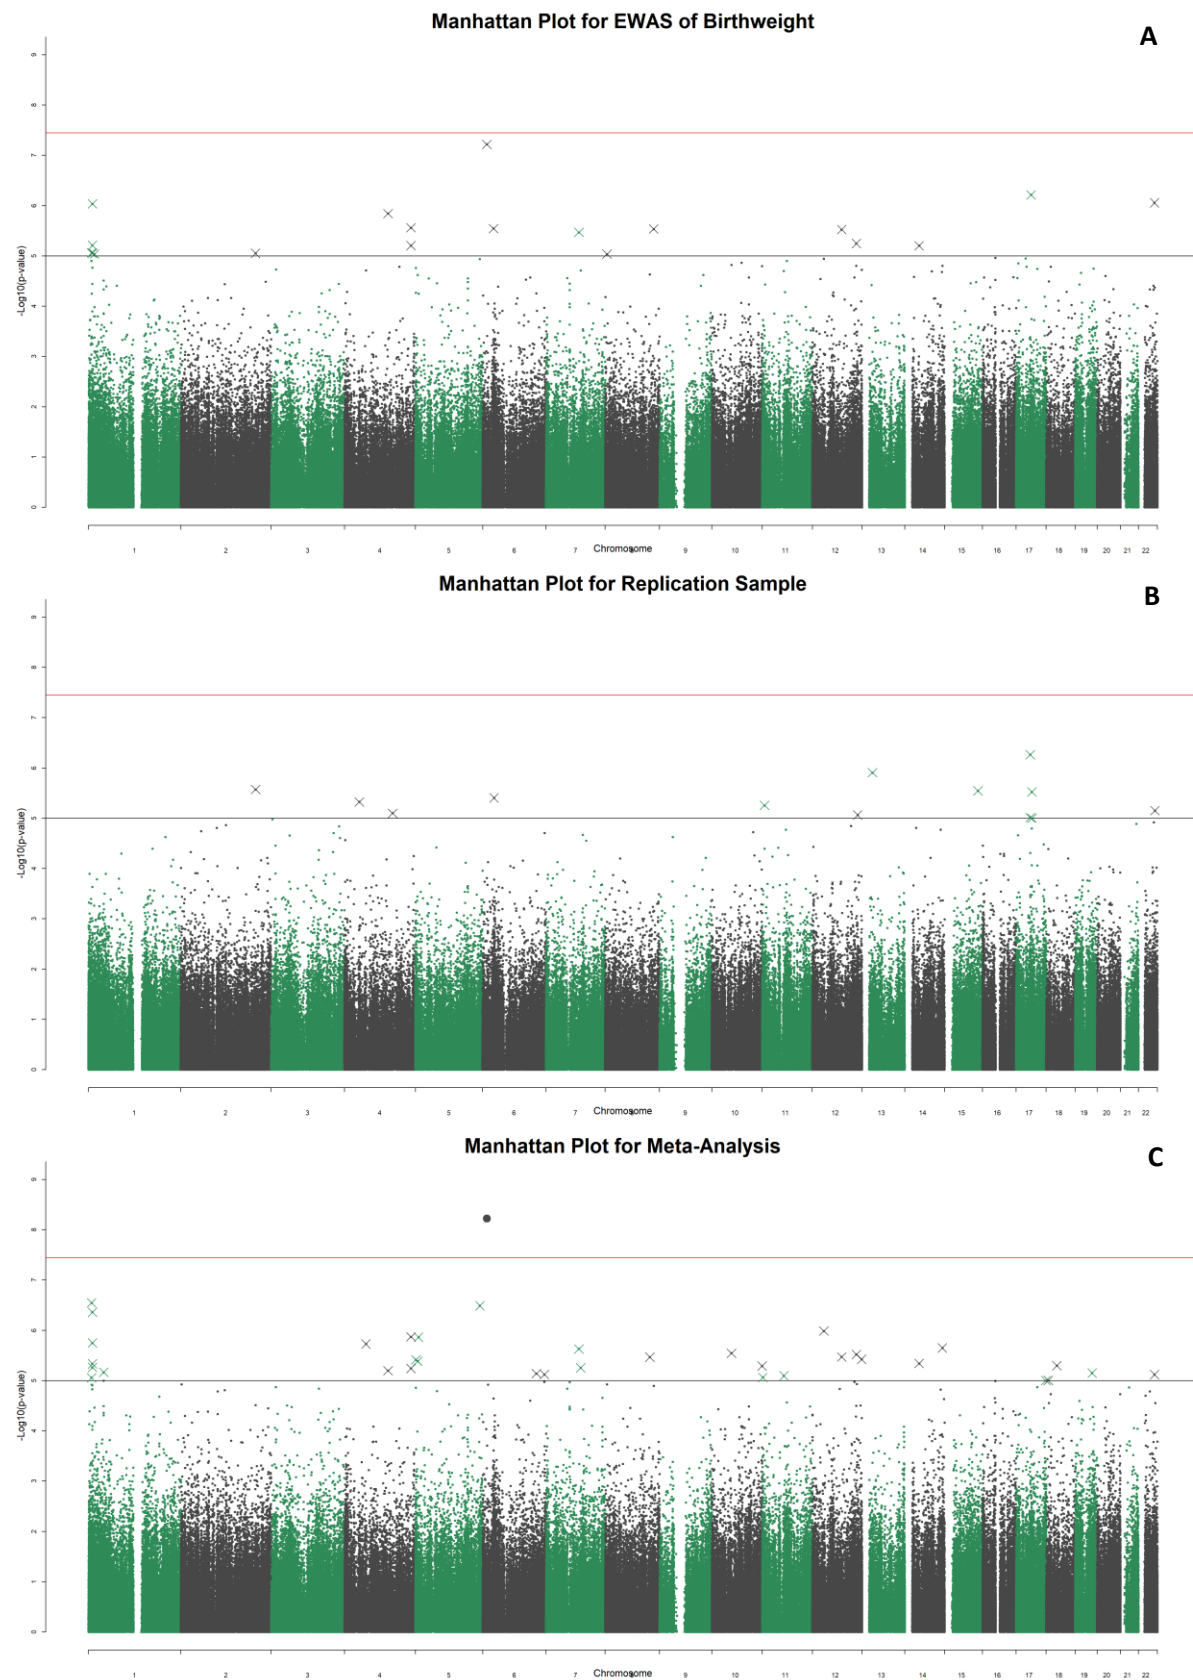





**Figure 3:** Effect sizes for 18 of the top 19 CpG sites in the discovery sample plotted against the effect sizes in the replication sample (cg04988918 was not included in the replication array). The point size is determined by the  $-\log_{10}$  of the p-values for these hits in the replication analysis. The two points labelled in black are the two CpG sites which achieved nominal significance in the replication study, and the three highlighted in red are the three co-methylated CpG sites within the *CASZ1* gene.

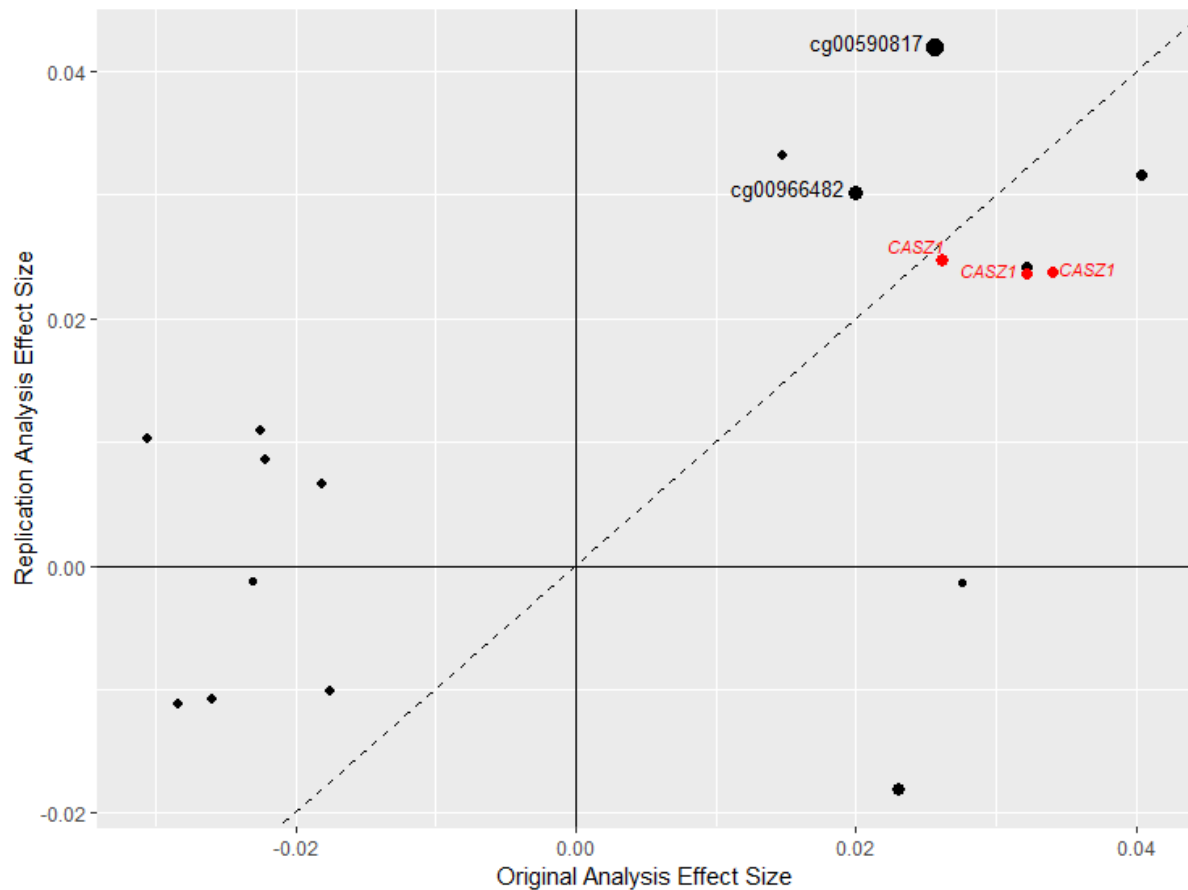

Source: http://biorxiv.org/cgi/reprint/664045v1
